# Supplementary material for: Photoelectrochemical properties and interfacial charge transfer kinetics of BODIPY-sensitized TiO2 electrodes
Source: Royal Society of Chemistry journal article supplement (doi:10.1039/c2ra21656f), 2012-12-04
Supplement: c2ra21656f.pdf [file c2ra21656f.pdf]

# Supplementary Information for Publication

## Photoelectrochemical Properties and Interfacial Charge Transfer

### Kinetics of BODIPY-sensitized TiO<sub>2</sub> electrodes

Hongwei Geng,<sup>a</sup> Caleb M. Hill,<sup>a</sup> Shanlin Pan,<sup>a\*</sup> Shilei Zhu,<sup>b</sup> Haiying Liu,<sup>b</sup> Libai Huang<sup>c</sup>

<sup>a</sup> Department of Chemistry, The University of Alabama, Tuscaloosa, Alabama 35487

<sup>b</sup> Department of Chemistry, Michigan Technological University, Houghton, Michigan 49931

<sup>c</sup> Radiation Laboratory, University of Notre Dame, Notre Dame, Indiana 46556

#### Synthesis of BODIPY-1 and 2

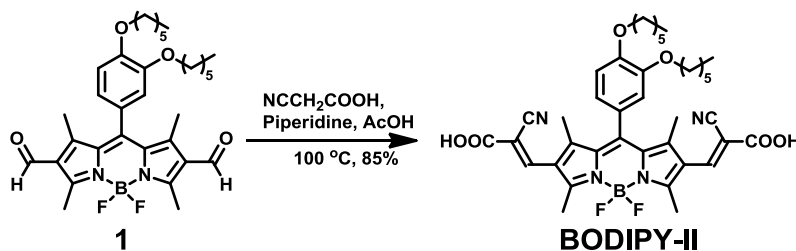

#### 4,4-Difluoro-8-(3,4-dihexyloxyphenyl)-1,3,5,7-tetramethyl-2,6-bis[(E)-2-carboxy-2-cyanovinyl]-4-bora-3a,4a-diaza-s-indacene (BODIPY-II).

BODIPY dye 1 (58 mg, 0.1 mmol) and cyanoacetic acid (85 mg, 1.0 mmol) were refluxed in a mixture of benzene (15 mL), toluene (5 mL), piperidine (0.2 mL) and AcOH (0.1 mL). Any water formed during the reaction was removed using Dean-Stark apparatus. After 3 h, the mixture was diluted with EtOAc and then was washed with water and brine, respectively. The organic layer was collected, dried over Na<sub>2</sub>SO<sub>4</sub> and concentrated in vacuo. The residue was purified by precipitation with CH<sub>2</sub>Cl<sub>2</sub> and MeOH. The precipitated solid was collected and washed by CH<sub>2</sub>Cl<sub>2</sub> to obtain BODIPY dye (BODIPY-II) as red-purple solid (60 mg, 85%). <sup>1</sup>H NMR (400 MHz, CD<sub>3</sub>OD): δ 8.10 (s, 2H), 7.13 (d, *J* = 8.4 Hz, 1H), 6.93 (d, *J* = 2.0 Hz, 1H), 6.87 (dd, *J* = 8.0, 2.0 Hz, 1H), 4.07 (t, *J* = 6.0 Hz, 2H), 3.99 (t, *J* = 6.4 Hz, 2H), 2.61 (s, 6H), 1.85-1.72 (m, 4H), 1.61 (s, 6H), 1.56-1.44 (m, 4H), 1.39-1.30 (m, 8H), 0.94-0.87 (m, 6H).

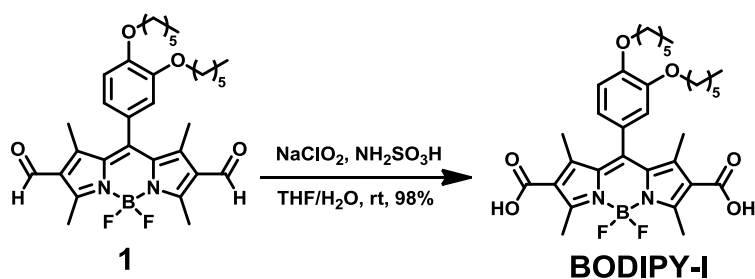

**4,4-Difluoro-8-(3,4-dihexyloxyphenyl)-1,3,5,7-tetramethyl-2,6-dicarboxy-4-bora-3a,4a-diaza-s-indacene (BODIPY-1).**

To BODIPY **1** (58 mg, 0.1 mmol) in mixed solution of THF (6 mL) and water (2 mL) was added NaClO<sub>2</sub> (90 mg, 1.0 mmol) and NH<sub>2</sub>SO<sub>3</sub>H (97 mg, 1.0 mmol). The mixture was stirred at room temperature for one hour, diluted with EtOAc and washed by aqueous Na<sub>2</sub>S<sub>2</sub>O<sub>3</sub>. The organic layer was collected, dried over Na<sub>2</sub>SO<sub>4</sub> and concentrated to form red-orange powder. The powder was washed twice by CH<sub>2</sub>Cl<sub>2</sub> to yield BODIPY dye (**BODIPY-I**) (60 mg, 98%) as red-orange powder. <sup>1</sup>H NMR (400 MHz, DMSO-d<sub>6</sub>): δ 7.09 (d, *J* = 8.4 Hz, 1H), 6.99 (s, 1H), 6.84 (d, *J* = 8.0 Hz, 1H), 3.99 (t, *J* = 6.4 Hz, 2H), 3.92 (t, *J* = 6.4 Hz, 2H), 2.68 (s, 6H), 1.71-1.41 (m, 10H), 1.39-1.34 (m, 4H), 1.29-1.22 (m, 8H), 0.85-0.79 (m, 6H).

**Fig. S1.** SEM images of (a) bare ITO, (b) ITO coated with TiO<sub>2</sub> (ITO/TiO<sub>2</sub>), (c) ITO/TiO<sub>2</sub>/BODIPY-1, (d) ITO/TiO<sub>2</sub>/BODIPY-2. All SEM images have size of 1 μm × 1 μm.

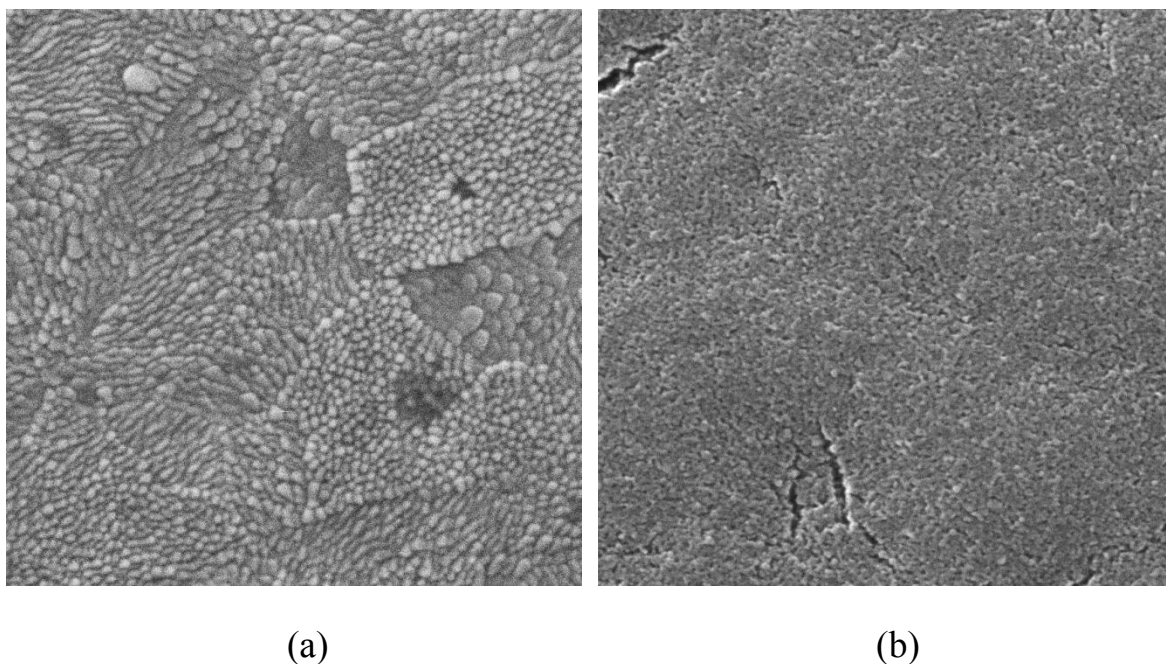

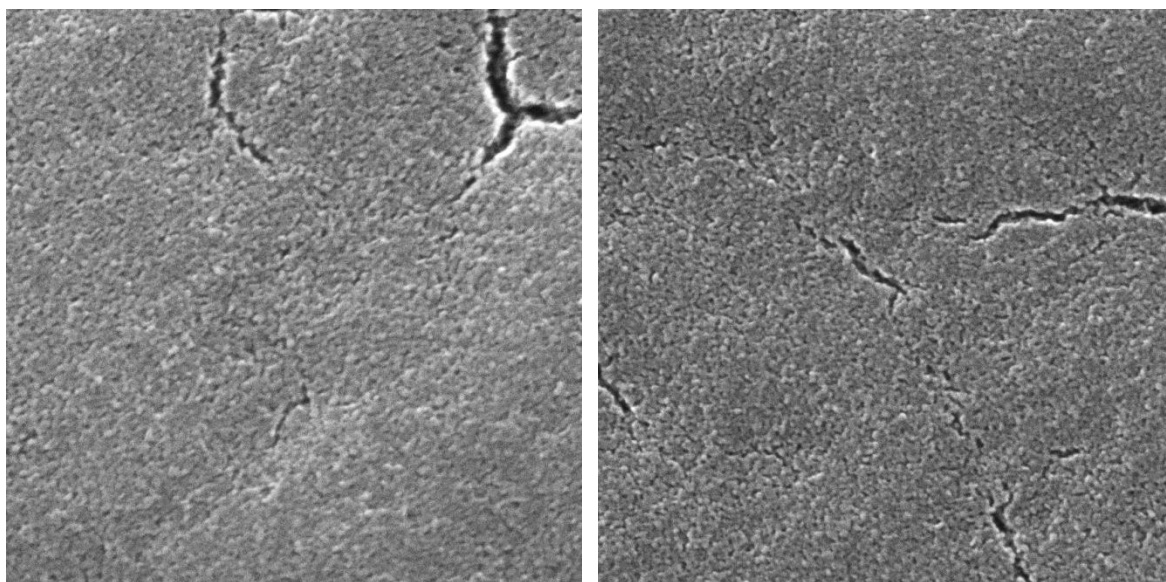

(c)

(d)

**Fig. S2.** Current-Voltage characteristics of ITO/TiO<sub>2</sub>/BODiPY electrodes in an electrochemical cell as the white light illumination was turned on or off. 0.05 M LiI and 0.05 M I<sub>2</sub> in acetonitrile was used as an electrolyte.

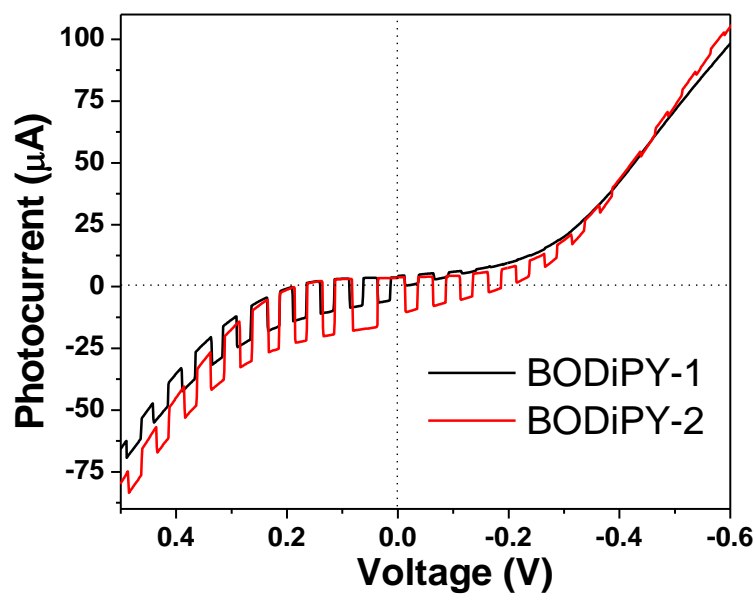

**Fig. S3.** Cyclic voltammograms of (a) BODIPY-1 dye drop-casted on glassy carbon working electrode, 0.1 M TBAPF<sub>6</sub> in acetonitrile as electrolyte, Pt wire as counter electrode, and Ag/AgNO<sub>3</sub> as the reference electrode and (b) BODIPY-2 dye in DMF solution (1.5 mM) with 0.1 M TBAPF<sub>6</sub>, Pt disc working electrode, Pt wire counter electrode, and SCE as reference electrode, respectively. Scan rate: 50 mV/s.

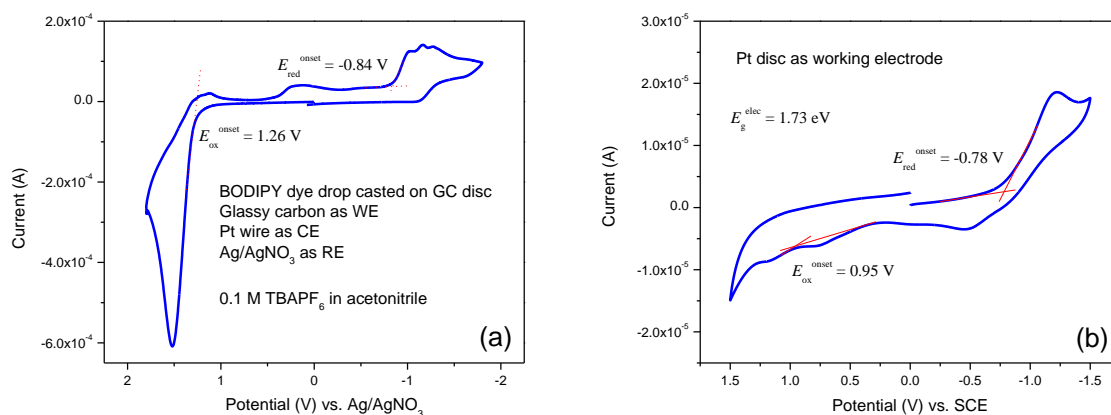

The electrochemical properties of the two BODIPY dyes were also studied by cyclic voltammetry. The BODIPY-1 dye was drop-casted on a glassy carbon electrode from DMF solution, using a Pt wire and Ag/AgNO<sub>3</sub> (10 mM Ag<sup>+</sup> in acetonitrile) as counter electrode and reference electrode, respectively. As shown in Figure S2(a), the onset points of n-doping and p-doping process of BODIPY-1 dye are at -0.84 V and 1.26 V, and the band-gap of the BODIPY-1 dye was calculated by  $E_g^{elec} = (E_{red}^{onset} + 4.7) - (E_{ox}^{onset} + 4.7) = 2.10$  eV. The CV curve for the BODIPY-2 dye is shown in Figure S2 (b). The onset points of n-doping and p-doping process of BODIPY-1 dye are at -0.78 V and 0.95 V, and the electrochemistry band-gap of BODIPY-2 dye is 1.73 eV, which calculated according the same equation.
